# Supplementary material for: Selenoprotein H mediates low selenium-related cognitive decline through impaired oligodendrocyte myelination with disrupted hippocampal lipid metabolism in female mice
Source: Royal Society of Chemistry journal article supplement (doi:10.1039/d4fo00888j), 2024-01-01
Supplement: d4fo00888j1.pdf [file d4fo00888j1.pdf]

## Supplemental Figures

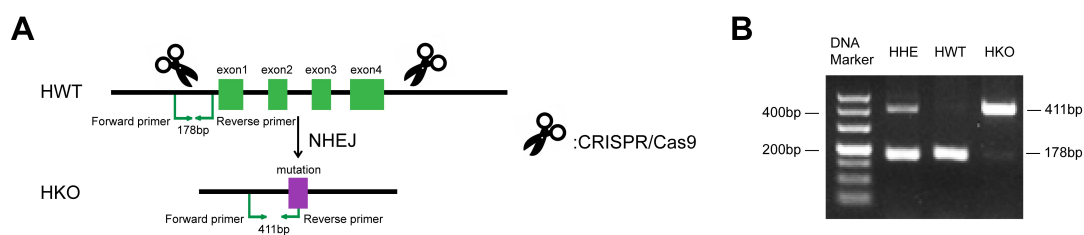

**Figure S1. Generation and characterization of *Selenoh* knockout mice.**

(A) Schematic diagram. The CRISPR/Cas9 technology was employed to induce a full deletion mutation in the reading frame of the *Selenoh* gene, resulting in functional loss through non-homologous end joining (NHEJ) repair. (B) Representative PCR amplification results from the tail DNA of heterozygous (HHE), wild-type (HWT), and knockout (HKO) mice.

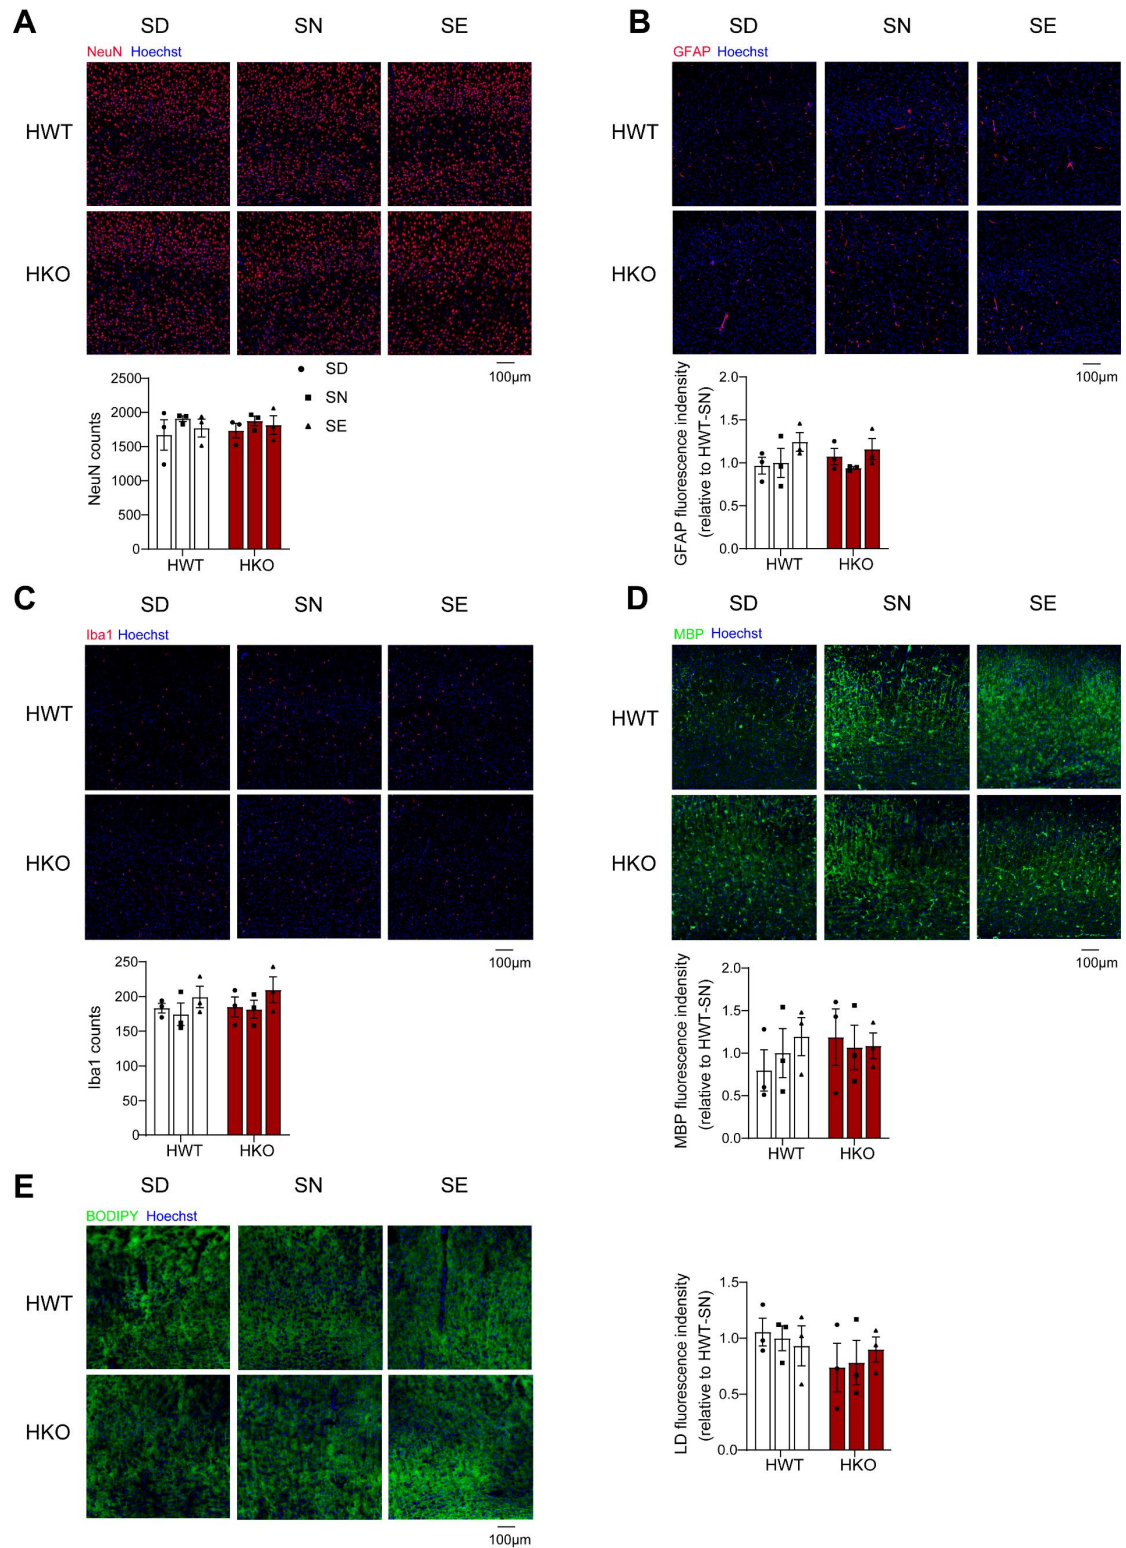

**Figure S2. There were no significant changes in various types of cells in the cortex of *Selenoh* knockout mice.**

Representative images showing immunostaining of NeuN (A), GFAP (B), Iba1 (C), MBP (D), and BODIPY (E) in the cortex of HWT and HKO mice, with quantification of NeuN cell

counts, Iba1 cell counts, and analysis of GFAP, MBP, and BODIPY fluorescence intensity ( $n = 3$  each). Red, NeuN (A), GFAP (B), and Iba1 (C). Green, MBP (D) and BODIPY (E). Blue, nuclear staining with Hoechst. Scale bar, 100  $\mu\text{m}$  (A-E). Analysis by two-way ANOVA with post hoc Tukey test for multiple comparisons. Data are represented as mean  $\pm$  SEM. Each point represents a biological replication. Abbreviations: SD, selenium-deficient diet; SE, selenium-excessive diet; SN, selenium-normal diet.

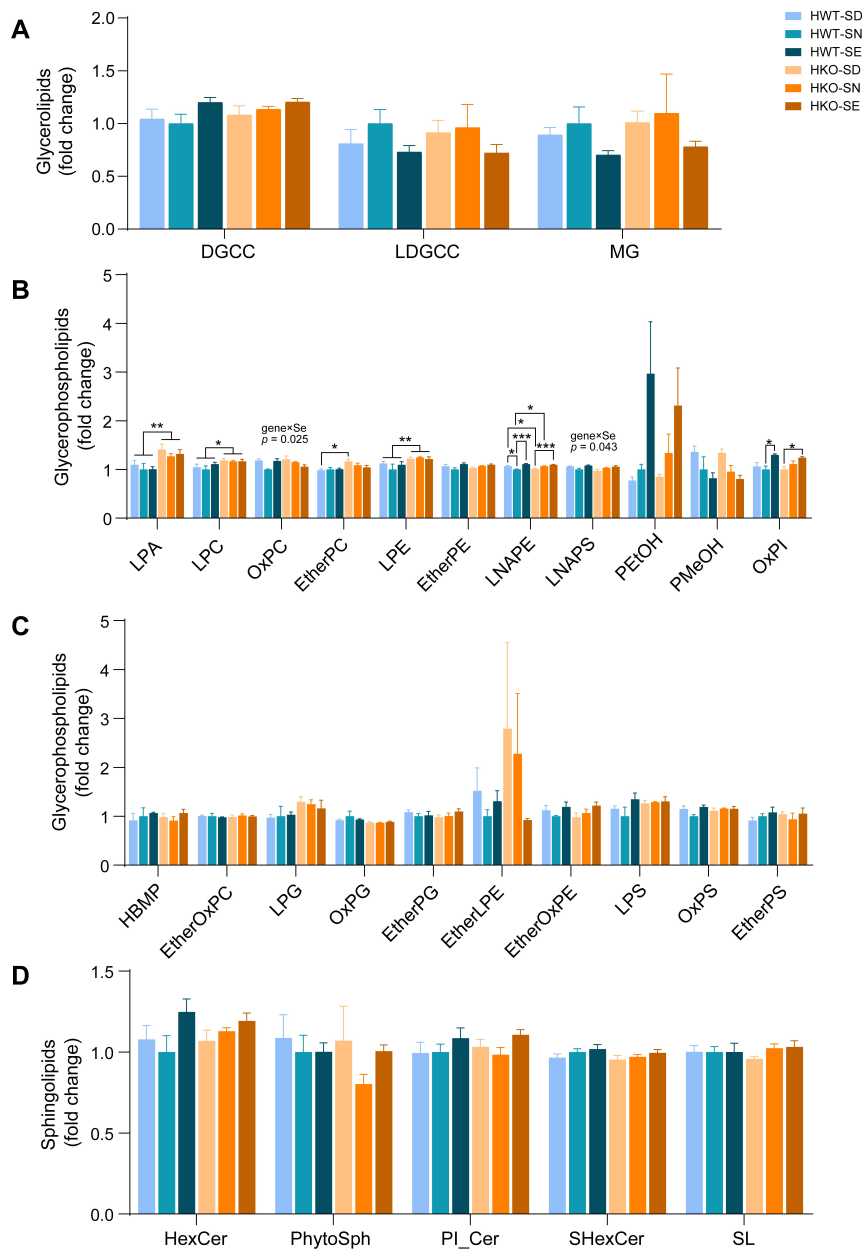

**Figure S3. The lipidome profile in the hippocampus of mice.**

Lipid classes identified by statistical analysis, include Glycerolipids (A) Glycerophospholipids (B and C), and Sphingolipids(D) [ $n = 4$  (HWT-SD), 4 (HWT-SN), 4

(HWT-SE), 4 (HKO-SD), 3 (HKO-SN), and 5 (HKO-SE)].  $*p < 0.05$ ,  $**p < 0.01$ , and  $***p < 0.001$  by two-way ANOVA with post hoc Tukey test for multiple comparisons. Data are represented as mean  $\pm$  SEM.

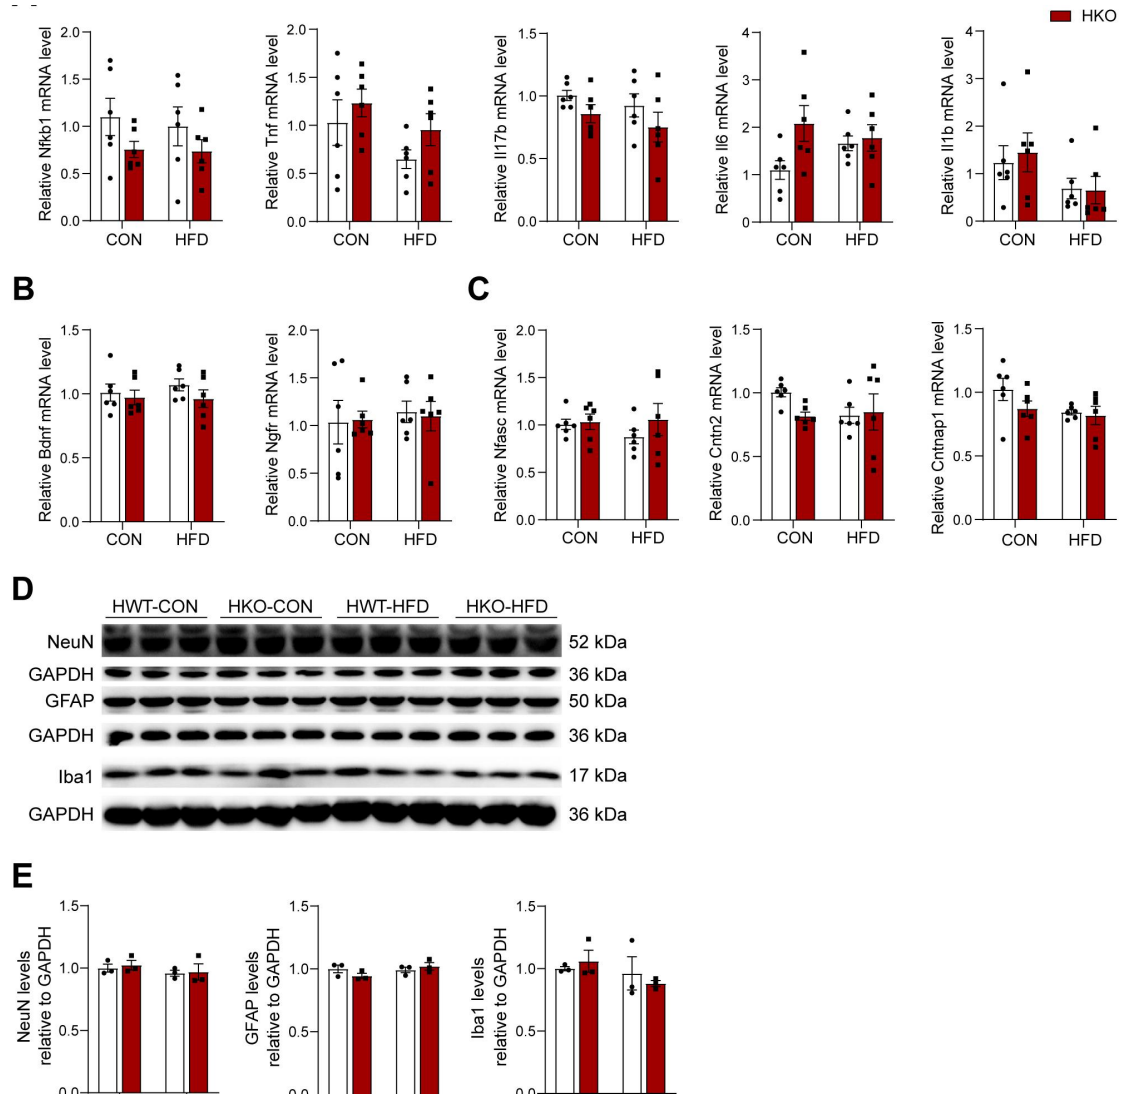

**Figure S4. The expression of genes and proteins, pro-inflammatory factors, neurons, and neuroglial cells in the hippocampus.**

Expression levels of inflammatory genes (A), neurotrophic factors genes (B), and myelination genes (C) in the hippocampus measured by qPCR. (D and E) Representative western blotting results showing the protein levels of NeuN, GFAP, and Iba1 in hippocampal tissues ( $n = 3$  each). Analysis by two-way ANOVA with post hoc Tukey test for multiple comparisons. Data are represented as mean  $\pm$  SEM. Each point represents a biological replication ( $n = 6$  each).

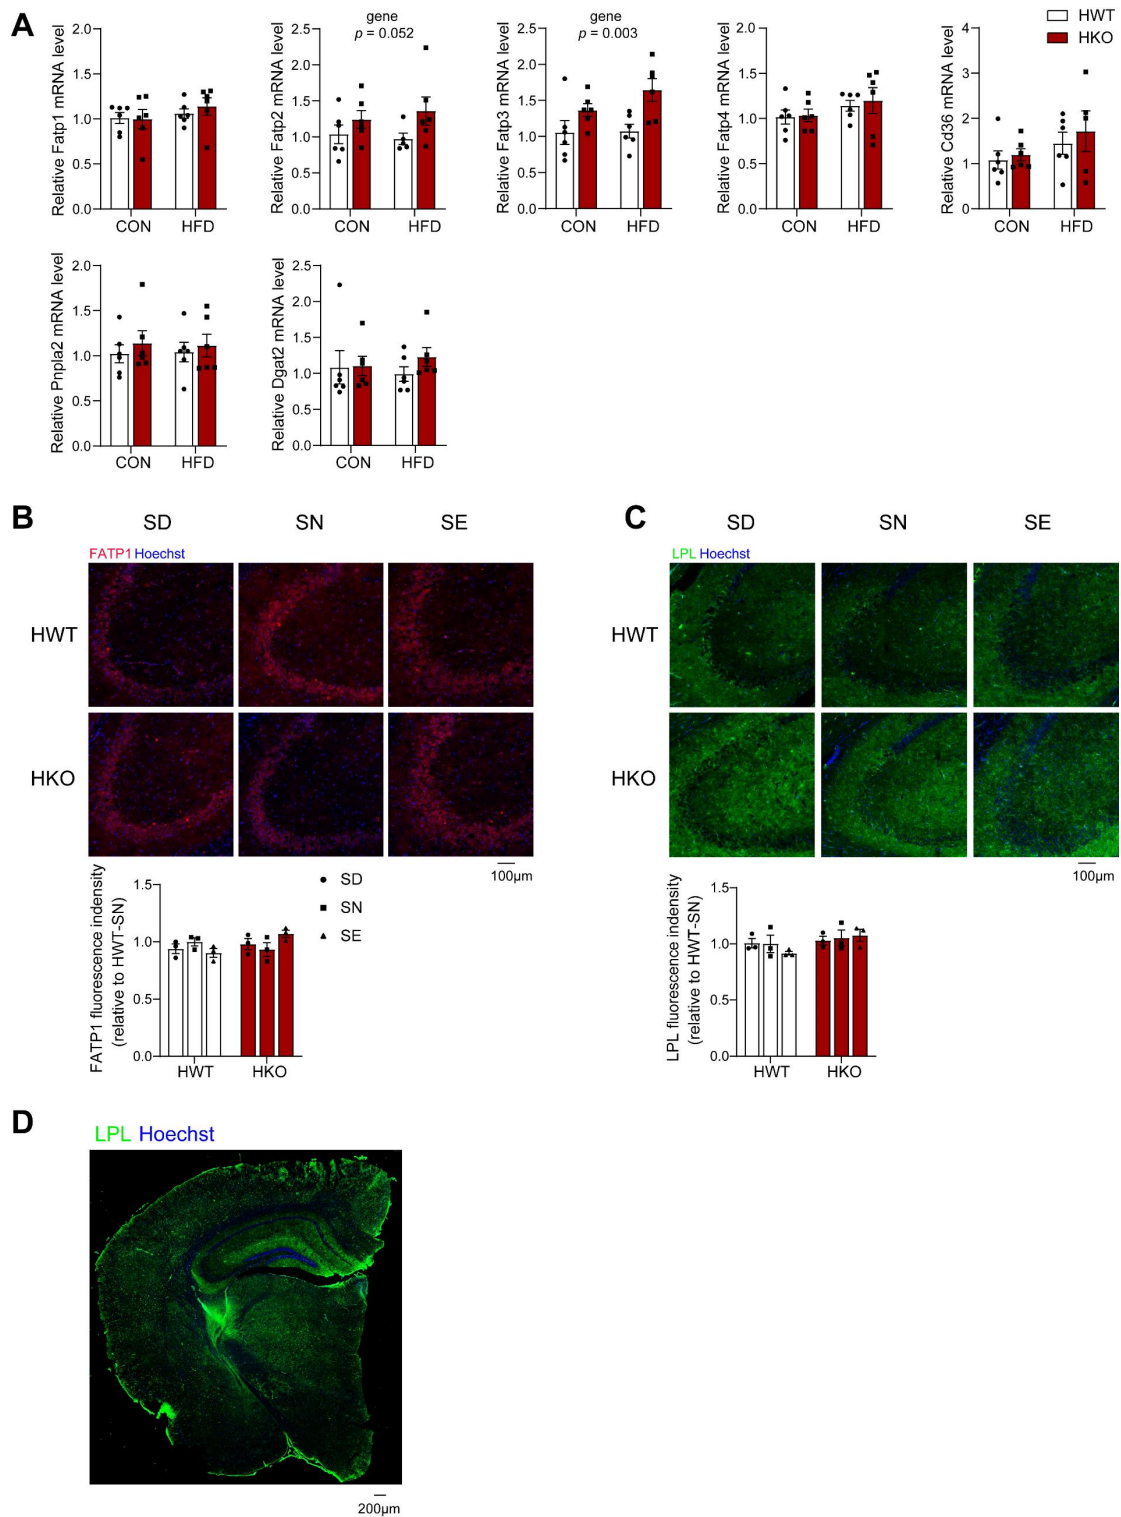

**Figure S5. FATPs and LPL expression in the hippocampus of mice.**

(A) mRNA level of lipid metabolism-related genes in the hippocampus ( $n = 6$  each). Representative images showing immunostaining of FATP1 (B) and LPL (C) in the hippocampus of HWT and HKO mice, with analysis of FATP1 and LPL fluorescence intensity ( $n = 3$  each). Red, FATP1 (B). Green, LPL (C). Blue, nuclear staining with

Hoechst (B, C). Scale bar, 100  $\mu$ m. (D) Representative images showing LPL fluorescence in the brain of mice. Green, LPL. Blue, nuclear staining with Hoechst. Scale bar, 200  $\mu$ m. Analysis by two-way ANOVA with post hoc Tukey test for multiple comparisons (A-C). Data are represented as mean  $\pm$  SEM. Each point represents a biological replication. Abbreviations: SD, selenium-deficient diet; SE, selenium-excessive diet; SN, selenium-normal diet.

Table S1 qPCR primer sequences.

| Gene    | Forward                | Reverse                 |
|---------|------------------------|-------------------------|
| Apc     | ACAGCAGGTTATTGCAAGTGTT | ACAGGTTCCATAAGGCACTCA   |
| Arc     | AAGTGCCGAGCTGAGATGC    | CGACCTGTGCAACCCTTTC     |
| Bdnf    | TCATACTTCGGTTGCATGAAGG | AGACCTCTCGAACCTGCCC     |
| Cd36    | TGGCTAAATGAGACTGGGAC   | TCCAATCCCAAGTAAGGCCAT   |
| Cnp     | ACAAGATCATCCCTGGCTCTCG | AGCACAAGAACCCTGATGTCC   |
| Cntn2   | TGGGGAACAGTACCAGAGTG   | TTTGCCTTCATCCGATCGACT   |
| Cntnap1 | GTACCTGCCTCCAGATTTCCC  | TAGAACAGCACCAGCATTCCC   |
| Cspg4   | ACCCAGGCTGAGGTAAATGCT  | AGGACATCTCGTGCTCATACAGA |
| Dgat2   | CAGGTGCCGTCTTGGGTTAT   | CAGGAGGATATGCGCCAGAG    |
| Fatp1   | AACATGGACGGCAAGGTCGG   | AGTGGCTCCATCGTGTCTCTC   |
| Fatp2   | TCCGGTGGAAAGGAGAGAAC   | GCACGCCATACACATTCACT    |
| Fatp3   | CCAGGAATCTTTGGCCACT    | GGCCCCTATATCTTGGTCCAG   |
| Fatp4   | CTGCACAAGACAGGGACCTTC  | AACAGCGGGTCTTTCACAAC    |
| Gapdh   | TTGGGCTACACTGAGGACCA   | GCCGTATTCATTGTCATACCAGG |
| Il-1b   | AGGTCAAAGGTTTGGAAAGCA  | TGAAGCAGCTATGGCAACTG    |
| Il17b   | TACAGCATCAACCACGACCC   | GGGATTCACGCAACCCAAAC    |
| Il-6    | TGGTACTCCAGAAGACCAGAGG | AACGATGATGCACTTGCAGA    |
| Lgi4    | TCACTCACCCACCTAAGCCT   | CAGAGTCTCCAAGCCTCGGAA   |
| Mag     | CTGGACATCGTCAACACCCC   | AACTGACCTCCACTTCCGTTC   |
| Mbp     | ACTTGATCCGCCTCTTTTCCC  | TCTGAAGCTCGTCGGACTCT    |

|        |                         |                         |
|--------|-------------------------|-------------------------|
| Mog    | CCATCGGACTTTTGATCCTC    | CTCAAAGGGGTTTCTTAGCTCT  |
| Myrf   | ACAAGGAGCGAATCTTCATGG   | CATCAATGCGAGTCTCTAGGTT  |
| Nfasc  | ACTCCAACCTGCAGCTTACACC  | GTACTIONGCCACCTCGACTCC  |
| Nfkb1  | AGCACATAGATGAACTCCGGGA  | TCCTTCCTGCCATAACCGT     |
| Ngfr   | CGTGACCATCTCAGGCCTTT    | GGTGCCCCTGTTACCTTCTC    |
| Nr4a1  | TCACTGATCGACACGGGCTC    | TAGCCATGTGCTCCTTCAGAC   |
| Olig2  | CTGGCGCGAAACTACATCCTC   | CTTCATCTCCTCCAGCGAGT    |
| Opalin | TCTGAGAATCCTAGGCGGTCAC  | CTTCCCGAGACAGTCTTCACA   |
| Plp    | AGCTGCCTCTTTCTTTGCTTG   | CCCCAGCCATCTGACTCGTG    |
| Plp1   | AAACAGCTGAGTTCCAAATGACC | CCCATGAGTTTAAGGACGGCGAA |
| Pnpla2 | GTCCTTCACCATCCGCTTG     | GATGCTACCCGTCTGCTCT     |
| Prl    | AAGATAATTAGCCAGGCCTA    | GCGCAAAGACAAGATTTTGA    |
| Tnf    | ACTCAAATGGGCTTTCCGAA    | GACAGAGGCAACCTGACCAC    |

Table S2 Antibodies and dilutions used for Western blot analysis.

| Antibodies  | Dilution | Identifier | Source                                        |
|-------------|----------|------------|-----------------------------------------------|
| anti-SELH   | 1:500    | ab151023   | Abcam, Cambridge, MA, USA                     |
| anti-PSD95  | 1:500    | sc-32290   | Santa Cruz Biotechnology, Santa Cruz, CA, USA |
| anti-SYP    | 1:500    | sc-17750   | Santa Cruz Biotechnology, Santa Cruz, CA, USA |
| anti-PRL    | 1:500    | sc-271773  | Santa Cruz Biotechnology, Santa Cruz, CA, USA |
| anti-GFAP   | 1:500    | sc-33673   | Santa Cruz Biotechnology, Santa Cruz, CA, USA |
| anti-MBP    | 1:500    | sc-271524  | Santa Cruz Biotechnology, Santa Cruz, CA, USA |
| anti-MAG    | 1:500    | sc-166849  | Santa Cruz Biotechnology, Santa Cruz, CA, USA |
| anti-MOG    | 1:500    | sc-166172  | Santa Cruz Biotechnology, Santa Cruz, CA, USA |
| anti-OLIG2  | 1:500    | sc-515947  | Santa Cruz Biotechnology, Santa Cruz, CA, USA |
| anti-CNPase | 1:500    | sc-166558  | Santa Cruz Biotechnology, Santa Cruz, CA, USA |
| anti-CC1    | 1:500    | sc-9998    | Santa Cruz Biotechnology, Santa Cruz, CA, USA |
| anti-FATP4  | 1:500    | sc-393309  | Santa Cruz Biotechnology, Santa Cruz, CA, USA |
| anti-LPL    | 1:500    | sc-373759  | Santa Cruz Biotechnology, Santa Cruz, CA, USA |

|            |        |            |                                               |
|------------|--------|------------|-----------------------------------------------|
| anti-NG2   | 1:500  | sc-33666   | Santa Cruz Biotechnology, Santa Cruz, CA, USA |
| anti-Iba1  | 1:1000 | #17198     | Cell signaling Technology, Danvers, MA, USA   |
| anti-PLIN2 | 1:5000 | 15294-1-AP | Proteintech, Wuhan, China                     |
| anti-NeuN  | 1:1000 | 26975-1-AP | Proteintech, Wuhan, China                     |
| anti-ARC   | 1:5000 | 66550-1-Ig | Proteintech, Wuhan, China                     |
| anti-FATP2 | 1:2000 | 14048-1-AP | Proteintech, Wuhan, China                     |
| anti-FATP3 | 1:2000 | 12943-1-AP | Proteintech, Wuhan, China                     |
| anti-PLP1  | 1:500  | A14251     | Abclonal, Wuhan, China                        |
| anti-FATP1 | 1:1000 | A12847     | Abclonal, Wuhan, China                        |
| anti-GAPDH | 1:5000 | Ac002      | Abclonal, Wuhan, China                        |
